# Supplementary material for: Efficacy of Treatment with the Antibiotic Novobiocin against Infection with Bacillus anthracis or Burkholderia pseudomallei
Source: MDPI journal article supplement (doi:10.3390/antibiotics11121685), 2022-11-23
Supplement: s1 [file s1]

## Supplementary File

**Table S1.** Strains, plasmids and primers used in construction of *B. thailandensis* E555  $\Delta ilvI$ .

| Strain, plasmid or primer | Relevant characteristics*                                                                                            | Source or Reference |
|---------------------------|----------------------------------------------------------------------------------------------------------------------|---------------------|
| <i>E. coli</i>            |                                                                                                                      |                     |
| <i>E. coli</i> ®10G       | General cloning and blue/white screening                                                                             | Lucigen             |
| SM10                      | Mobilizing strain with transfer genes of RP4 integrated on chromosome; Km <sup>r</sup>                               | (30)                |
| <i>B. thailandensis</i>   |                                                                                                                      |                     |
| E264                      | Soil isolate from central Thailand                                                                                   | (26)                |
| E555                      | Cambodian soil isolate expressing a <i>B. pseudomallei</i> -like CPS gene cluster; Tp <sup>s</sup> , Pm <sup>r</sup> | (27)                |
| E555 $\Delta ilvI$        | E555 harboring a 428-bp in-frame deletion in <i>ilvI</i>                                                             | This study          |
| Plasmids                  |                                                                                                                      |                     |
| pCR2.1-TOPO               | 3,931-bp TA vector; pMB1 <i>oriR</i> ; Km <sup>r</sup> , Ap <sup>r</sup>                                             | Life Technologies   |
| pCR2.1- <i>Bt ilvI</i>    | pCR2.1-TOPO harboring the 1,117-bp <i>Bt ilvI</i> -up and <i>Bt ilvI</i> -dn PCR product                             | This study          |
| pCR2.1- $\Delta Bt ilvI$  | pCR2.1- <i>Bt ilvI</i> with a 428-bp <i>SalI</i> fragment removed                                                    | This study          |
| pEX18Tp- <i>pheS</i>      | Gene replacement vector based on <i>pheS</i> ; Tp <sup>r</sup>                                                       | (31)                |
| pEX18Tp- $\Delta Bt ilvI$ | pEX18Tp- <i>pheS</i> containing the <i>NheI</i> insert from pCR2.1- $\Delta Bt ilvI$                                 | This study          |
| Primers (5'-3')           |                                                                                                                      |                     |
| <i>Bt ilvI</i> -up        | GCTAGCCGCTCCTCTTGTCGCGAAG                                                                                            | eurofins            |
| <i>Bt ilvI</i> -dn        | GCTAGCTACAGATCTTCCGATCCGAG                                                                                           | eurofins            |

\* r, resistant; s, susceptible; Tp, trimethoprim; Pm, polymyxin B; Km, kanamycin; Ap, ampicillin.

**Construction of *B. thailandensis* E555  $\Delta ilvI$  –**

The methods used for DNA manipulation and PCR amplification have been described in detail elsewhere [29]. Gene replacement with *B. thailandensis* E555 was performed using the *pheS*-based vector pEX18Tp-*pheS*, as previously described [31]. A 1.1-kb portion of the *Burkholderia thailandensis* E264 *ilvI* gene, locus tag *BTH\_I1045*, was PCR-amplified using purified genomic DNA and the primers *Bt ilvI*-up and *Bt ilvI*-dn (Table S1). The PCR product was cloned into pCR2.1-TOPO and a 428-bp *SalI* fragment was removed and it was re-ligated. The resulting plasmid, pCR2.1- $\Delta Bt ilvI$ , was digested with *NheI* and the product was cloned into the *XbaI* site of pEX18Tp-*pheS* (Table S1). Plasmid pEX18Tp- $\Delta Bt ilvI$  (Table S1) was electroporated into *Escherichia coli* SM10 (12.25 kV/cm) and conjugated with *B. thailandensis* E555 for 8 h on LB agar. Trimethoprim (Tp) was used at 300 µg/ml to select for merodiploid derivatives harboring the recombinant plasmid and polymyxin B (Pm) was used at 25 µg/ml to counterselect *E. coli* SM10. Multiple Tp<sup>r</sup> colonies were inoculated onto M9 Minimal Salts agar plates with 0.4% glucose (M9), 0.1% (wt/vol) p-chlorophenylalanine, 40 µg/ml L-isoleucine, 40 µg/ml L-leucine and 40 µg/ml L-valine (ILV) and incubated at 37°C for 2 days. Individual colonies that grew on this medium were subsequently picked to LB agar and M9 agar plates and incubated at 37°C for 3 days. *B. thailandensis* E555  $\Delta ilvI$  was identified as not being able to grow on M9 agar without added ILV and by colony PCR using the primers *Bt ilvI*-up and *Bt ilvI*-dn (Table S1). As expected, the PCR product generated from *B. thailandensis* E555  $\Delta ilvI$  was smaller than the product from *B. thailandensis* E555 (data not shown).
